# Supplementary material
Source: PubMed Central journal article supplement (PMC3714366)
Supplement: NIHMS474609-supplement-01.pdf [file NIHMS474609-supplement-01.pdf]

**Supplementary Table 1-- Primers for RT-PCR amplification of human all 19 Wnts, 10**

**Frizzled receptors (FZDs) and a housekeeping gene GAPDH**

| <b>Gene</b> | <b>Gene ID</b> | <b>Primer Fwd Sequence<br/>5'→3'</b> | <b>Primer Rev Sequence<br/>5'→3'</b> | <b>Product<br/>Size (bp)</b> |
|-------------|----------------|--------------------------------------|--------------------------------------|------------------------------|
| WNT1        | 7471           | CGGCGTTTATCTTCGCTATC                 | GCCTCGTTGTTGTGAAGGTT                 | 244                          |
| WNT2        | 7472           | CCAACGAAAAATGACCTCGT                 | TTGTCCAGTCAGCGTTCTTG                 | 286                          |
| WNT2B       | 7482           | GCCTTGGAGTGGTAGCCATA                 | GCTGACACTCTCGGATCCAT                 | 258                          |
| WNT3        | 7473           | TGTGAGGTGAAGACCTGCTG                 | AAAGTTGGGGGAGTTCTCGT                 | 207                          |
| WNT3A       | 89780          | CAAGATTGGCATCCAGGAGT                 | ATGAGCGTGTCACTGCAAAG                 | 173                          |
| WNT4        | 54361          | GCATCTCAGAGGAGGAGACG                 | TCAGAGCATCCTGACCACTG                 | 364                          |
| WNT5A       | 7474           | GGACCACATGCAGTACATCG                 | CACTCTCGTAGGAGCCCTTG                 | 380                          |
| WNT5B       | 81029          | CCAAAGGATCAGAGGAGCAG                 | TACACCTGACGAAGCAGCAC                 | 483                          |
| WNT6        | 7475           | GGTTATGGACCCTACCAGCA                 | ATAGAACAGGCCTGCGTGAC                 | 279                          |
| WNT7A       | 7476           | CCCACCTTCCTGAAGATCAA                 | ACAGCACATGAGGTCACAGC                 | 183                          |
| WNT7B       | 7477           | TCAACGAGTGCCAGTACCAG                 | GGCCTCATTGTTATGCAGGT                 | 353                          |
| WNT8A       | 7478           | GTTTATGCTCTGGGCAGCTC                 | ATCCTTTCCCAAATTCCAC                  | 414                          |
| WNT8B       | 7479           | CTGGTGCCCAGAGTGGTATT                 | GTTGTTGTGCAGGTTTCATGG                | 362                          |
| WNT9A       | 7483           | GCAAGCATCTGAAGCACAAG                 | TGCTCTCGCAGTTCTTCTCA                 | 246                          |
| WNT9B       | 7484           | GCTGGAACTGTAGCCTGGAG                 | CATGGCACTTACACGTGGTC                 | 351                          |
| WNT10A      | 80326          | AAGCTGCACCGCTTACAAC                  | ATTCTCGCGTGGATGTCTCT                 | 209                          |
| WNT10B      | 7480           | AATGCGAATCCACAACAACA                 | GGGTCTCGCTCACAGAAGTC                 | 288                          |
| WNT11       | 7481           | TGACCTCAAGACCCGATACC                 | GCTTCCGTTGGATGTCTTGT                 | 214                          |
| WNT16       | 51384          | GCTCCTGTGCTGTGAAAACA                 | TGCATTCTCTGCCTTGTGTC                 | 249                          |
| FZD1        | 5321           | ATTTGGTCAGTGCTGTGCTG                 | CGGCCAGGTGAAAATACTGT                 | 379                          |

|       |       |                           |                      |     |
|-------|-------|---------------------------|----------------------|-----|
| FZD2  | 2535  | CCCGACTTCACGGTCTACAT      | CTGTTGGTGAGGCGAGTGTA | 128 |
| FZD3  | 7976  | CTCTCTTTGGCCCTTGACTG      | ACAAAGAAAAGGCCGGAAAT | 223 |
| FZD4  | 8322  | GCCAATGTGCACAGAGAAGA      | AGGCTCCTTTTCACCCAGAT | 285 |
| FZD5  | 7855  | TTCCTGTCAGCCTGCTACCT      | TTCTCCAGCTTGTCCGTCTT | 518 |
| FZD6  | 8323  | TGTGGTTCCACCTTGTCGTA      | TATTGCAGGCTGTGCTATCG | 515 |
| FZD7  | 8324  | CCAACGGCCTGATGTACTTT      | GCCATGCCGAAGAAGTAGAG | 331 |
| FZD8  | 8325  | CTCCATCTGGTGGGTGATCT      | TGTAGAGCACGGTGAACAGG | 392 |
| FZD9  | 8326  | AGACCATCGTCATCCTGACC      | CCATGAGCTTCTCCAGCTTC | 231 |
| FZD10 | 11211 | CAACAAGAACGACCCCAACT      | GACGCAGTAGCACATGGAGA | 403 |
| GAPDH | 2597  | CCCTTCATTGACCTCAACTACATGG | CATGGTGGTGAAGACGCCAG | 209 |
