# Supplementary material
Source: PubMed Central journal article supplement (PMC3714366)
Supplement: NIHMS474609-supplement-02.pdf [file NIHMS474609-supplement-02.pdf]

## Supplementary Figure 1.

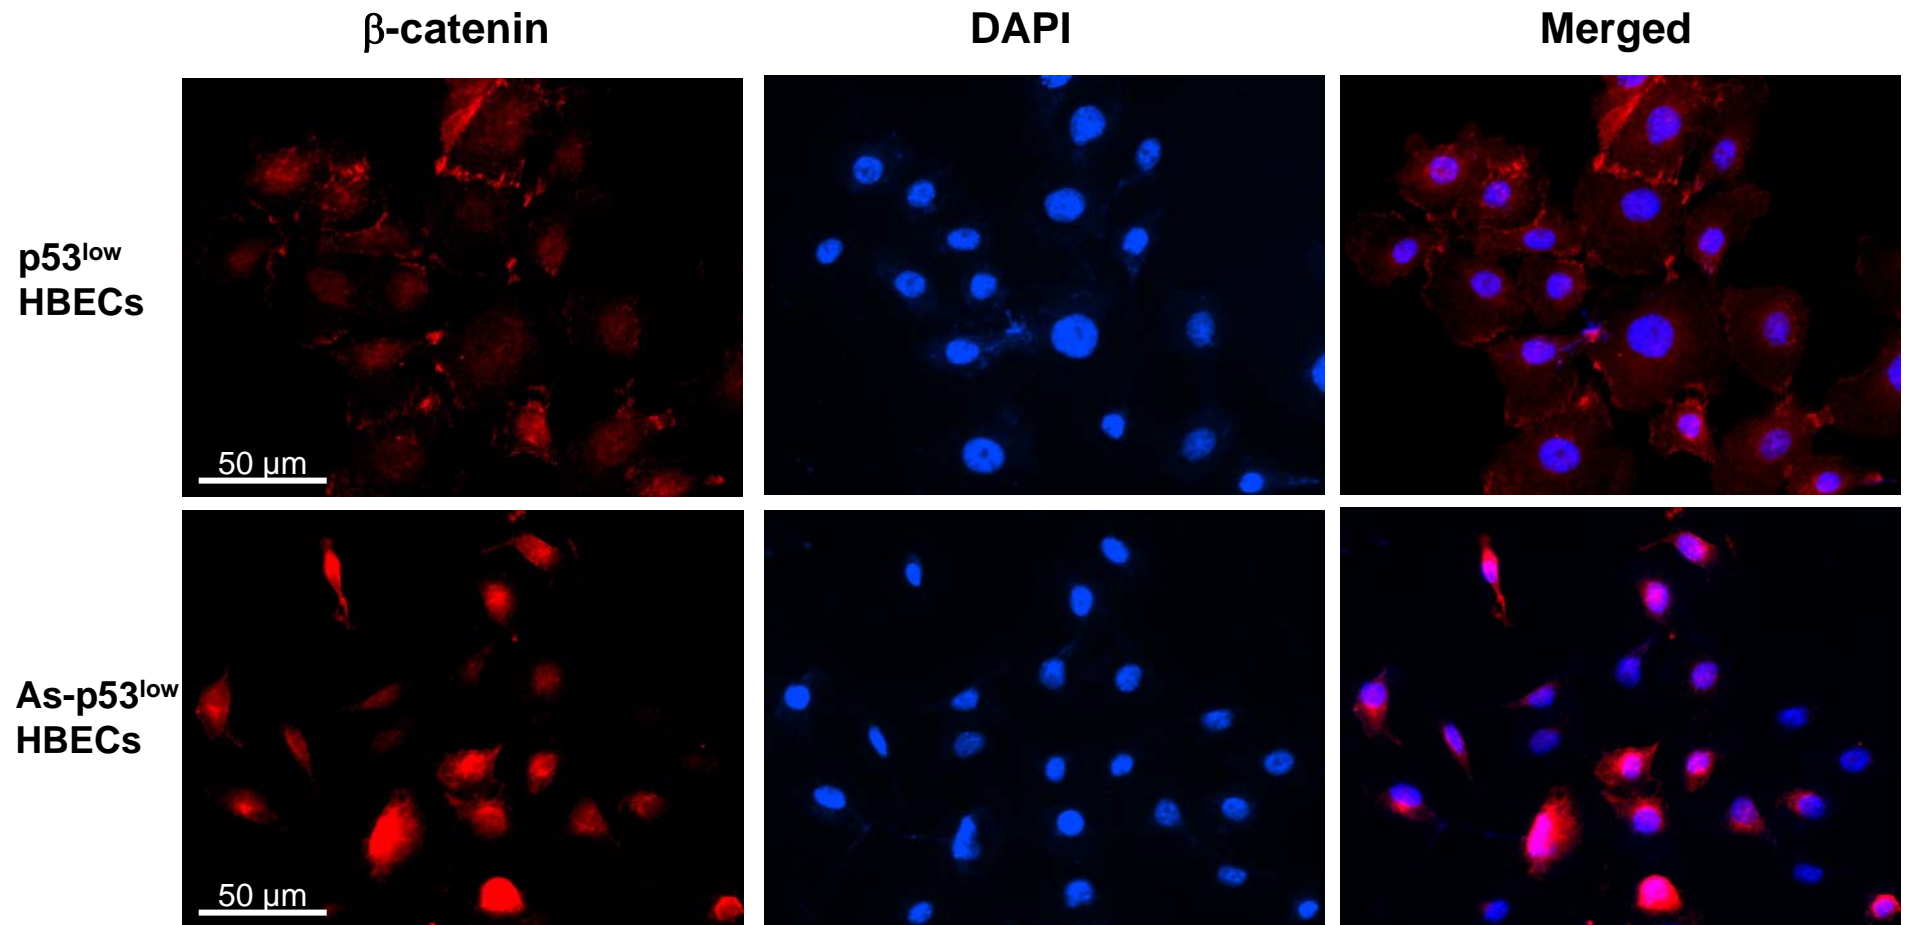

**Supplementary Figure 1.** Representative images of  $\beta$ -catenin immunofluorescence staining in p53<sup>low</sup>HBECs and arsenic-transformed cells (As-p53<sup>low</sup>HBECs).  $\beta$ -catenin (red color) and nuclear staining with DAPI (blue color) was performed as described in Materials and Methods.
