# Supplementary material
Source: PubMed Central journal article supplement (PMC3714366)
Supplement: NIHMS474609-supplement-04.pdf [file NIHMS474609-supplement-04.pdf]

### Supplementary Figure 3.

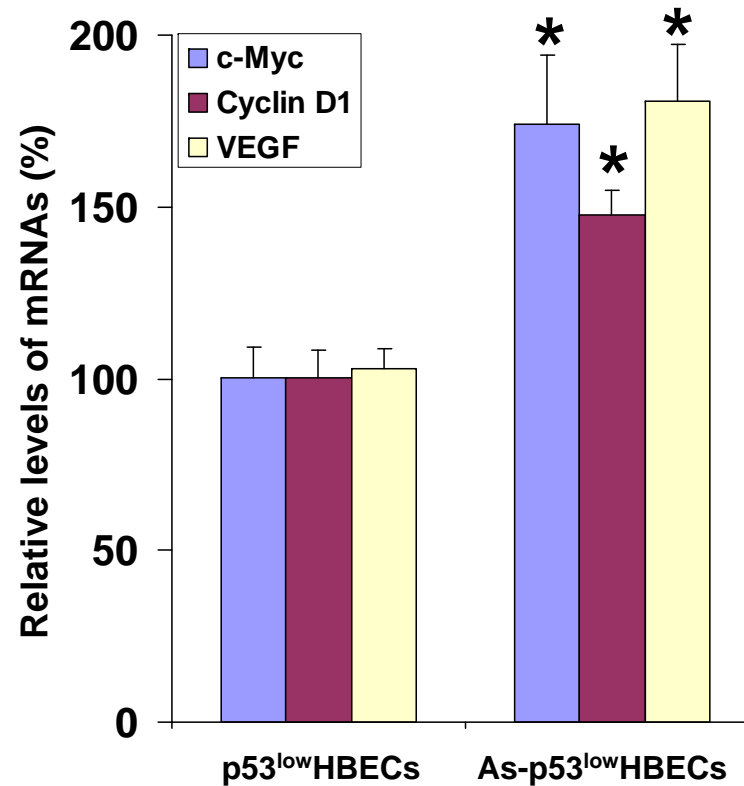

**Supplementary Figure 3.** Q-PCR analysis of cellular c-myc, cyclin D1 and VEGF mRNA levels in p53<sup>low</sup>HBECs and arsenic-transformed cells (As-p53<sup>low</sup>HBECs). The results are expressed as means  $\pm$  standard deviations (n=3). Q-PCR analysis was performed as described in Materials and Methods. \*  $p < 0.05$ , compared to the p53<sup>low</sup>HBECs.
